# Supplementary material for: On the Importance of Investigating Data Structure in Miniaturized NIR Spectroscopy Measurements of Food: The Case Study of Sugar
Source: MDPI journal article supplement (doi:10.3390/foods12030493), 2023-01-20

## Supplementary Material

**Supplementary Figure S1.** Dataset obtained for each instrument.

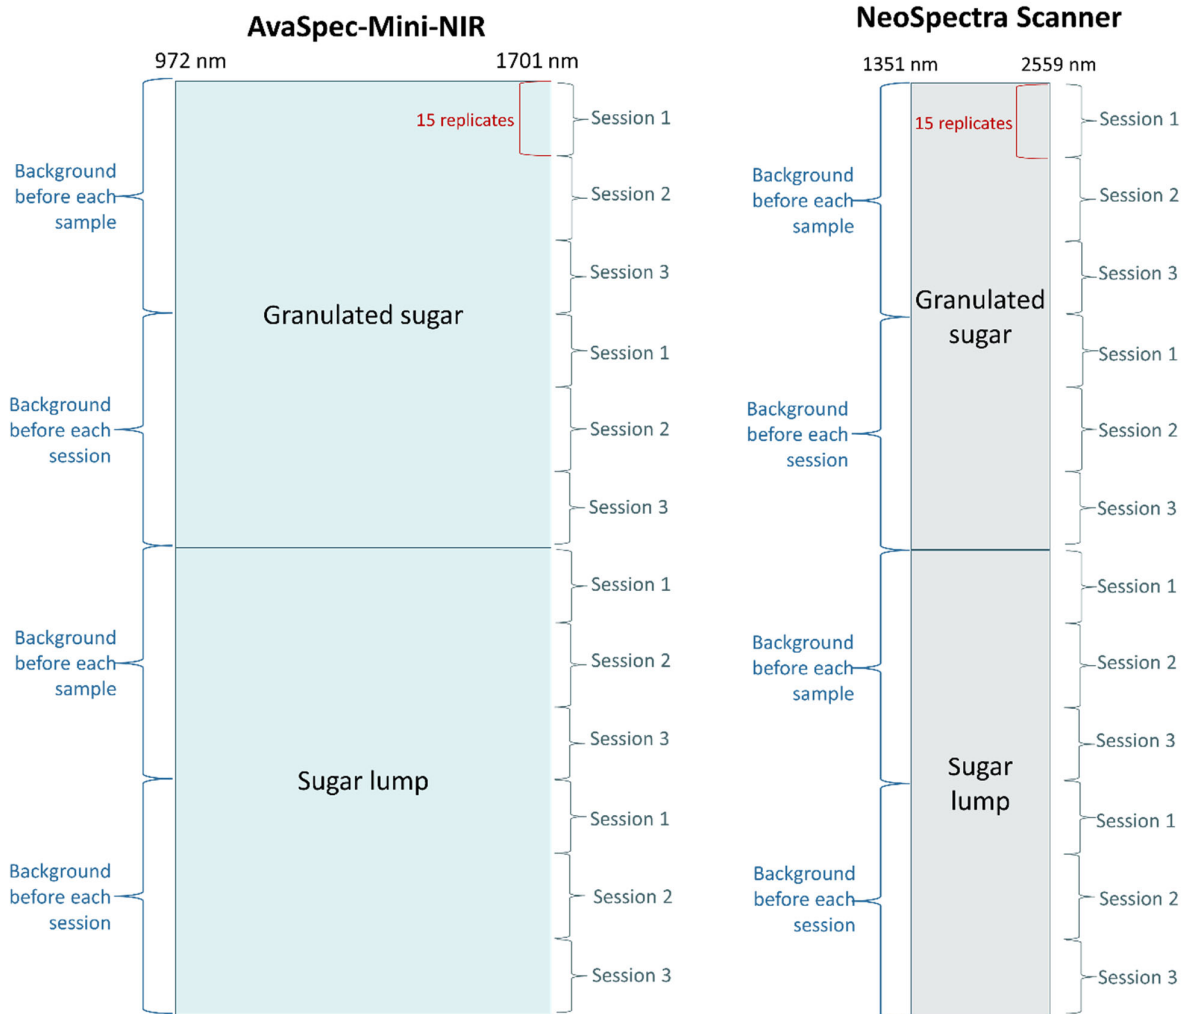

**Supplementary Figure S2.** Loadings plot of the PCA model calculated for AvaSpec-Mini Error Covariance Matrix. a) Sugar lump samples; b) Granulated sugar samples.

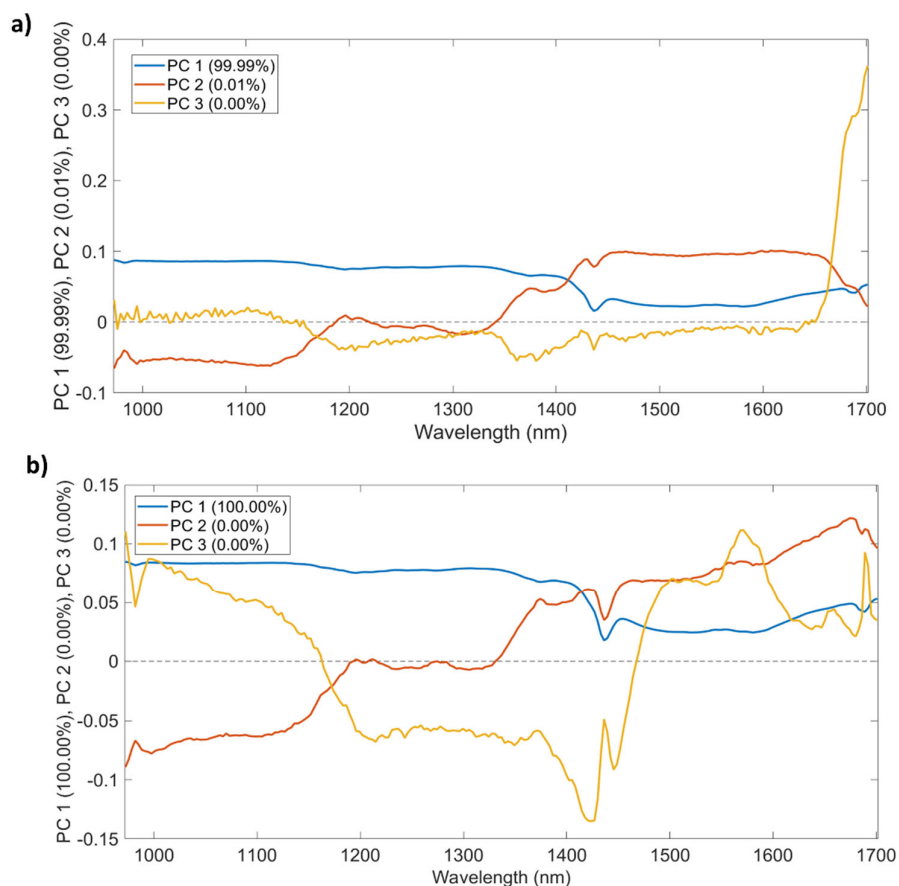

**Supplementary Figure S3.** Diagonal of the Covariance Matrices calculated over all replicates spectra collect with AvaSpec-Mini-NIR on sugar lump samples (a) and granulated sugar (b) and with NeoSpectra Scanner on sugar lump samples (c) and granulated sugar (d).

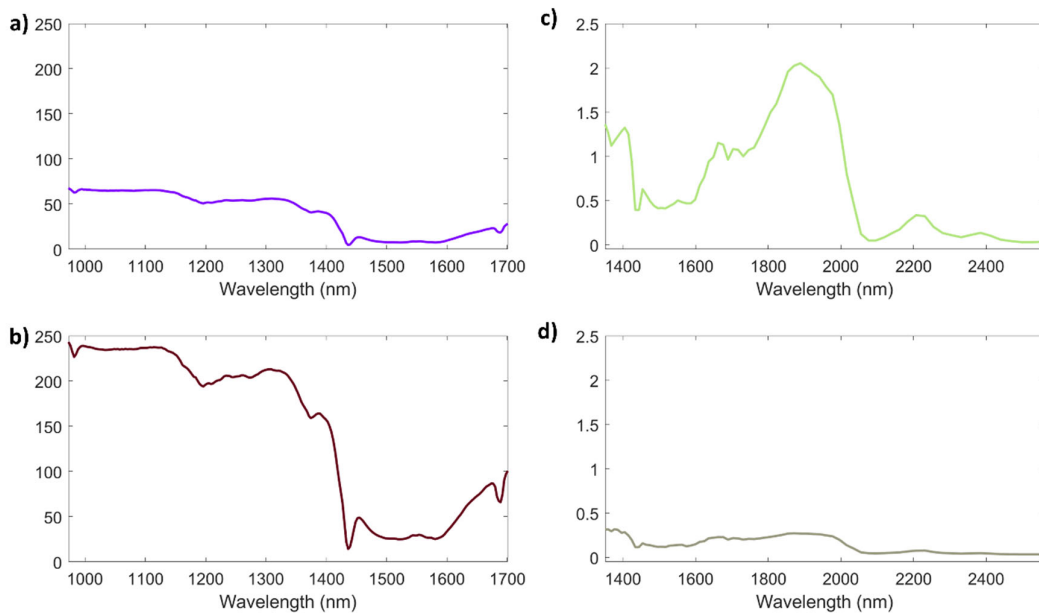

**Supplementary Figure S4.** Loadings plot of the PCA model calculated for NeoSpectra Scanner Error Covariance Matrix. a) Sugar lump samples; b) Granulated sugar samples.

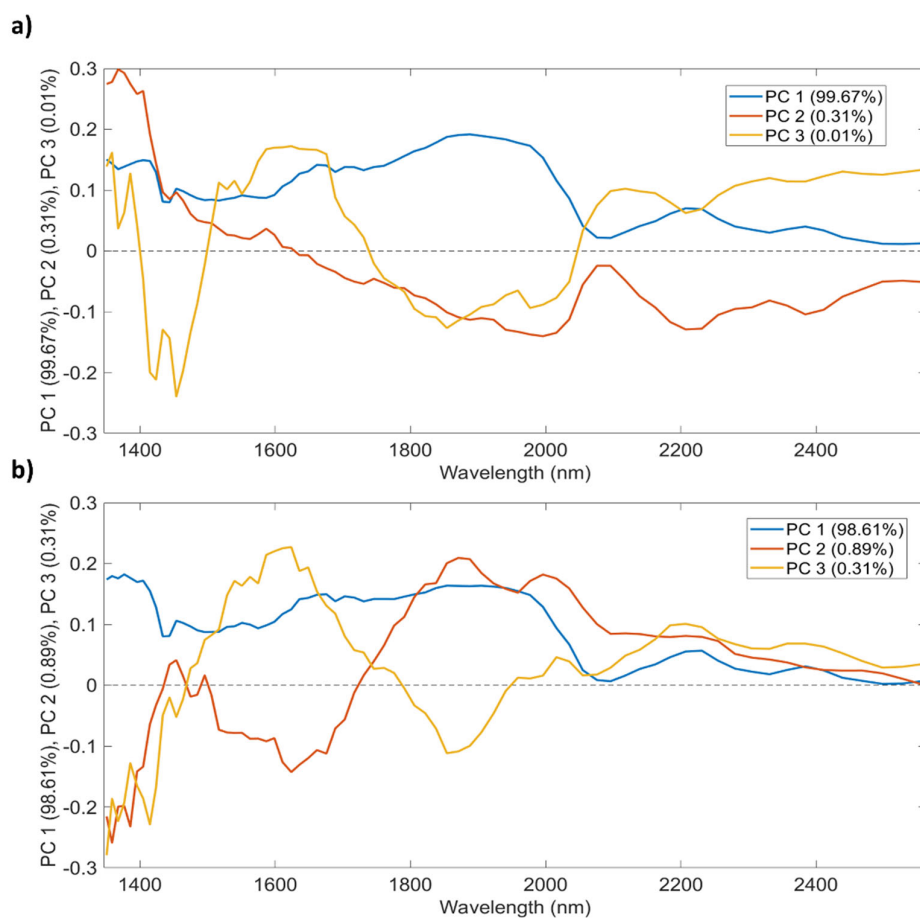

Supplement: s1 [file s1]
